# Supplementary material
Source: publisher figshare collection journal article supplement (https://acs.figshare.com/ndownloader/files/21732900)
Supplement: Supplementary file 1 [file 21732900]

# **Quantitative Analysis of Attachment Time of Air Bubbles to Solid Surfaces in Water**

*Seongsoo Han<sup>1,2</sup>, Anh V. Nguyen<sup>3\*</sup>, Kwanho Kim<sup>1</sup>, Jaikoo Park<sup>2</sup>, Kwangsuk You<sup>1\*</sup>*

<sup>1</sup> Convergence Research Center for Development of Mineral Resources (DMR), Korea Institute of Geoscience and Mineral Resources (KIGAM), 124 Gwahak-ro, Yuseong-gu, Daejeon 34132, Republic of Korea

<sup>2</sup> Department of Earth Resources and Environmental Engineering, Hanyang University, 222, Wangsimni-ro, Seongdong-gu, Seoul 04763, Republic of Korea

<sup>3</sup> School of Chemical Engineering, The University of Queensland, Brisbane, Queensland 4072, Australia

\*Corresponding Author Information

Kwangsuk You (youks@kigam.re.kr)

Anh.V. Nguyen (Anh.Nguyen@eng.uq.edu.au)

Number of pages: #8

Number of figures: #5

## SUPPORTING INFORMATION

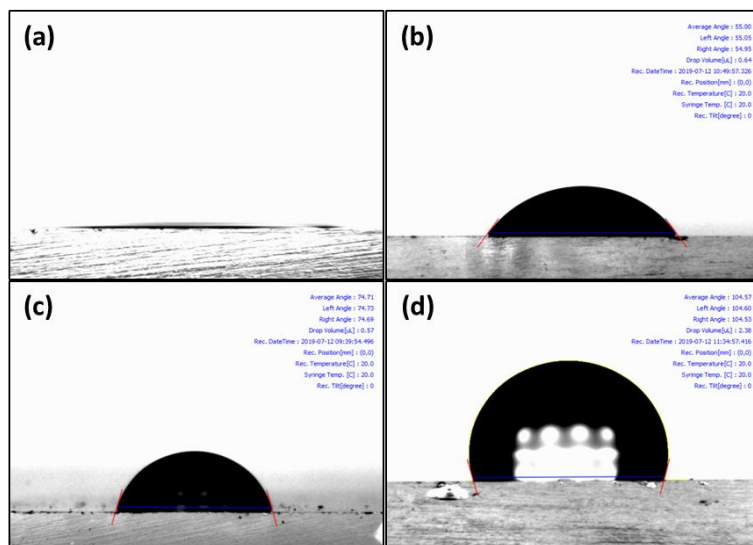

**Figure S1.** Images of the water droplet static contact angles (a) 0° (pristine glass slide), (b) 55° (0.01 mM OTS in toluene for 10 min), (c) 75° (0.1 mM OTS in toluene for 10 min), and (d) 105° (1 mM OTS in toluene for 10 min)

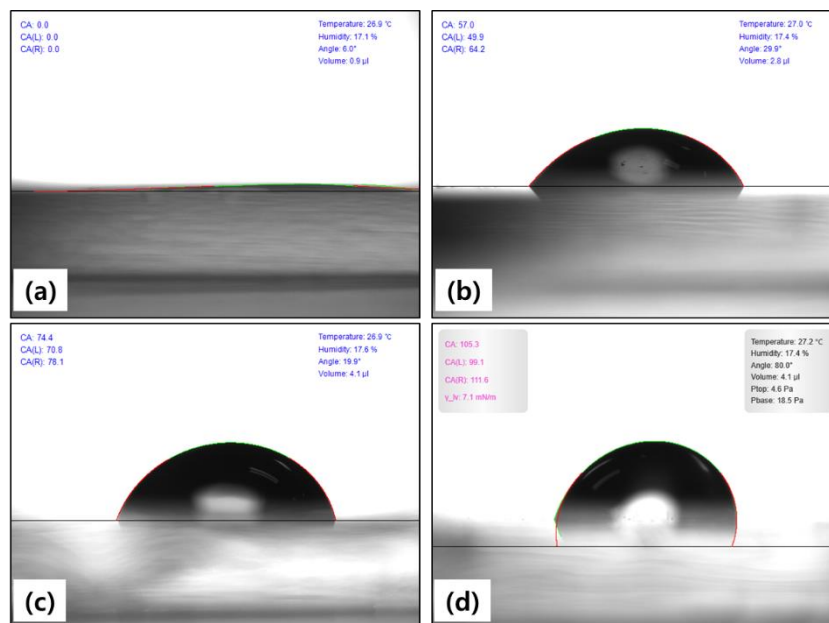

**Figure S2.** Images of the hysteresis of the water contact angles (a)  $0^\circ$  (pristine glass slide) (b)  $55 \pm 10^\circ$  (0.01 mM OTS in toluene for 10 min), (c)  $75 \pm 5^\circ$  (0.1 mM OTS in toluene for 10 min), and (d)  $105 \pm 5^\circ$  (1 mM OTS in toluene for 10 min)

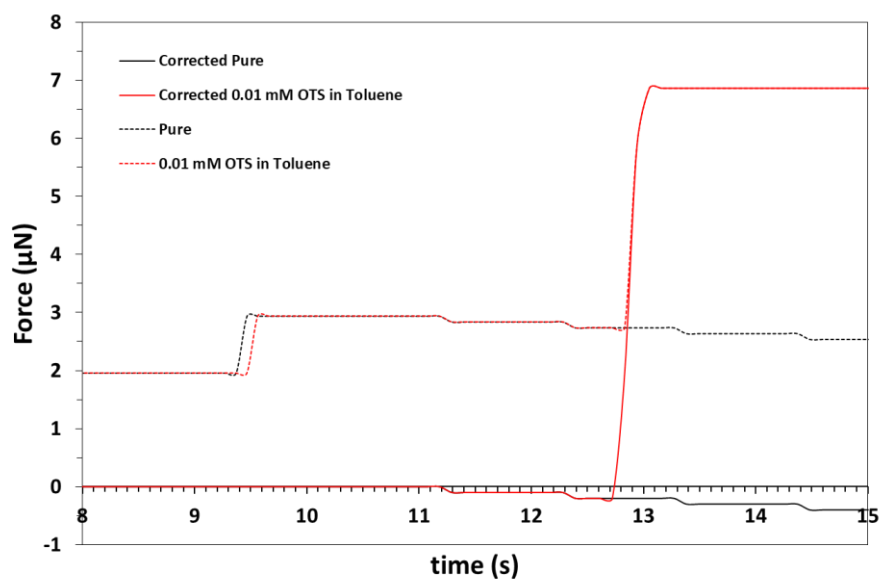

**Figure S3.** Corrected force curves incorporating the capillary effect of the needle produced by the water in the cell (solid line: after correction, dotted line: before correction)

## Conversion to dimensionless forms

Capillary number:  $Ca = \mu V / \sigma$

$$x = \frac{r}{R} Ca^{-1/4}; \quad y = \frac{h}{R} Ca^{-1/2}; \quad Y = \frac{H}{R} Ca^{-1/2}; \quad p = \frac{R}{\sigma} P; \quad \tau = \frac{\sigma \sqrt{Ca}}{R\mu} t; \quad \tau_0 = \frac{\sigma \sqrt{Ca}}{R\mu} t_0;$$

$$\wp = \frac{R}{\sigma} \Pi \quad ; \quad \Phi = \frac{F}{2\pi R \sigma Ca^{1/2}};$$

$$\frac{\partial y}{\partial \tau} = \frac{1}{4x} \frac{\partial}{\partial x} \left\{ xy^3 \frac{\partial p}{\partial x} \right\} + \frac{d^*}{x} \frac{\partial}{\partial x} \left\{ xy^2 \frac{\partial p}{\partial x} \right\} = \frac{1}{4} \left\{ \frac{y^3}{x} \frac{\partial p}{\partial x} + 3y^2 \frac{\partial y}{\partial x} \frac{\partial p}{\partial x} + y^3 \frac{\partial^2 p}{\partial x^2} \right\} + \dots$$

$$p(y, x) = 2 - \frac{1}{x} \frac{\partial}{\partial x} \left\{ x \frac{\partial y}{\partial x} \right\} - \wp(y) = 2 - \left\{ \frac{\partial^2 y}{\partial x^2} + \frac{1}{x} \frac{\partial y}{\partial x} \right\} - \wp(y)$$

$$y(x, \tau = 0) = Y + x^2 / 2$$

$$p(x, y, \tau = 0) = 0$$

$$\frac{\partial y_N}{\partial \tau} = -1 - \frac{\partial \Phi}{\partial \tau} \left\{ \log \frac{x_\infty Ca^{1/4}}{2} + B(\theta_o) \right\}$$

$$p(y, x \rightarrow \infty) = 0$$

$$\Phi = \int_0^{\tau_\infty} \{ p(x, \tau) + \wp(x, \tau) \} x dx$$

**At  $x = 0$ , we obtain the following limits:**

$$\left( \frac{\partial Y}{\partial x} \right)_{x=0} = 0; \quad \left( \frac{\partial p}{\partial x} \right)_{x=0} = 0$$

$$p(Y, 0) = 2 - 2 \left( \frac{\partial^2 Y}{\partial x^2} \right)_{x=0} - \wp(Y)$$

$$\frac{\partial Y}{\partial \tau} = \left\{ \frac{3}{2} Y^3 + d^* Y^2 \right\} \left\{ \frac{\partial^2 p}{\partial x^2} \right\}_{x=0}$$

## Numerical Solution by the three-point Finite Difference Method

We divide the film radius into  $N-1$  sections (stages) and consider  $N$  points on the 1D mesh.

Applying the three-point FDM, we obtain the following ordinary differential equations (ODEs):

**Section 1 (around the film symmetry):**  $Y = y_1$ ;  $\Delta = \text{film radius} / (N - 1)$

$$\frac{\partial y_1}{\partial \tau} = \left\{ \frac{3}{2} y_1^3 + d^* y_1^2 \right\} \frac{-2p_1 + 2p_2}{\Delta^2} ; \quad p_1 = 2 - \frac{-4y_1 + 4y_2}{\Delta^2} - \wp(y_1)$$

**Section  $k = 2$  to  $N-1$  (intermediate sections):**

$$\frac{\partial y_k}{\partial \tau} = \frac{m}{12} \left\{ \frac{y_k^3}{x_k} \frac{p_{k+1} - p_{k-1}}{2\Delta} + 3y_k^2 \frac{y_{k+1} - y_{k-1}}{2\Delta} \frac{p_{k+1} - p_{k-1}}{2\Delta} + y_k^3 \frac{p_{k+1} - 2p_k + p_{k-1}}{\Delta^2} \right\} + \dots$$

$$p_k = 2 - \left\{ \frac{y_{k+1} - 2y_k + y_{k-1}}{\Delta^2} + \frac{y_{k+1} - y_{k-1}}{2x_k \Delta} \right\} - \wp(y_k)$$

**Section  $N$  (at the film boundary):**

$$\frac{\partial y_N}{\partial \tau} = -1 - \frac{\partial \Phi}{\partial \tau} \left\{ \log \frac{x_\infty Ca^{1/4}}{2} + B(\theta_c) \right\} ; \quad p_N = 0$$

This system of ODEs can be solved using the Matlab ODE solver “ODE15S.”

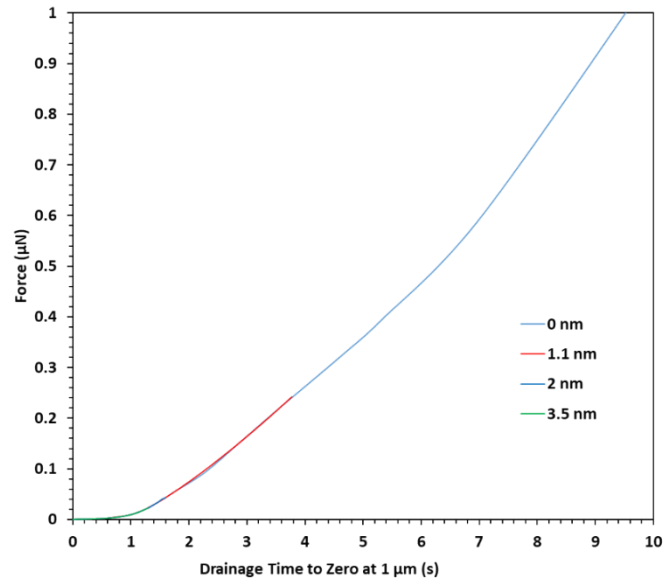

**Figure S4.** Force with respect to the drainage time calculated by Eq. 15 (before attachment)

The y-axis in Figure S3 is the force calculated by Eq. (15) in the manuscript:

$$F(t) = 2\pi \int_0^{\infty} \{P(x,t) + \Pi(x,t)\} x dx \quad (15)$$

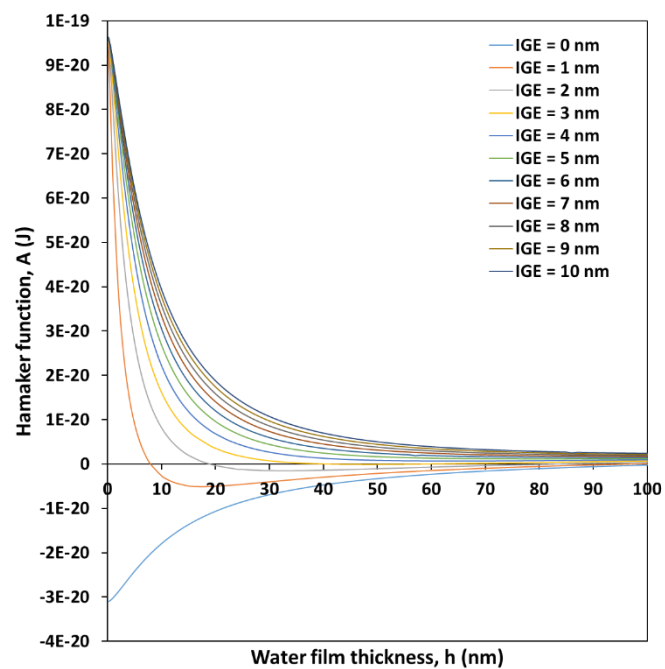

**Figure S5.** Hamaker function of silica showing increment with the IGE thickness.
